# Supplementary material for: Induction of Foxp3 demethylation increases regulatory CD4+CD25+ T cells and prevents the occurrence of diabetes in mice
Source: Springer Nature journal article supplement (doi:10.1007/s00109-009-0530-8), 2009-10-19
Supplement: MOESM3 [file 109_2009_530_MOESM3_ESM.doc]

**Supplemental figure 3.** The raw data of gels for Figure 4D and 4E.
